# Supplementary material for: Three-dimensional graphitic carbon nitride functionalized graphene-based high-performance supercapacitors
Source: Royal Society of Chemistry journal article supplement (doi:10.1039/c5ta00734h), 2015-01-01
Supplement: c5ta00734h1.pdf [file c5ta00734h1.pdf]

# **Supporting information for**

## **Three-Dimensional Graphitic Carbon Nitride Functionalized**

## **Graphene-Based High-Performance Supercapacitors**

Qing Chen, Yang Zhao, Xianke Huang, Nan Chen,\* and Liangti Qu\*

Key Laboratory of Cluster Science, Ministry of Education of China;

Beijing Key Laboratory of Photoelectronic/Electrophotonic Conversion

Materials;

School of Chemistry, Beijing Institute of Technology, Beijing 100081, China;

E-mail: gabechain@bit.edu.cn; lqu@bit.edu.cn

We investigated the mass ratio between g-C<sub>3</sub>N<sub>4</sub> and graphene in the composite. Considering from the two respects of relatively high nitrogen content and three-dimensional (3D) structure in the composites, g-C<sub>3</sub>N<sub>4</sub> of 10 mg, 7 mg, 4 mg and 2 mg was added respectively to the 15 mL GO aqueous (3 mg mL<sup>-1</sup>) in the process of g-C<sub>3</sub>N<sub>4</sub>@G aerogels through hydrothermal reduction. It was founded that the sample A (10 mg g-C<sub>3</sub>N<sub>4</sub>) are not 3D structure composites; while, the 3D structure is fragile and serious shrinkage after freeze-drying in both the sample B (7 mg g-C<sub>3</sub>N<sub>4</sub>) and sample C (4 mg g-C<sub>3</sub>N<sub>4</sub>), as shown in **Figure S1a, b, and c**. Unlike previous structure, a perfect 3D structure just like the 3D graphene (Figure S1d) was obtained in the sample D (2 mg g-C<sub>3</sub>N<sub>4</sub>, the ratio that mentioned in the manuscript).

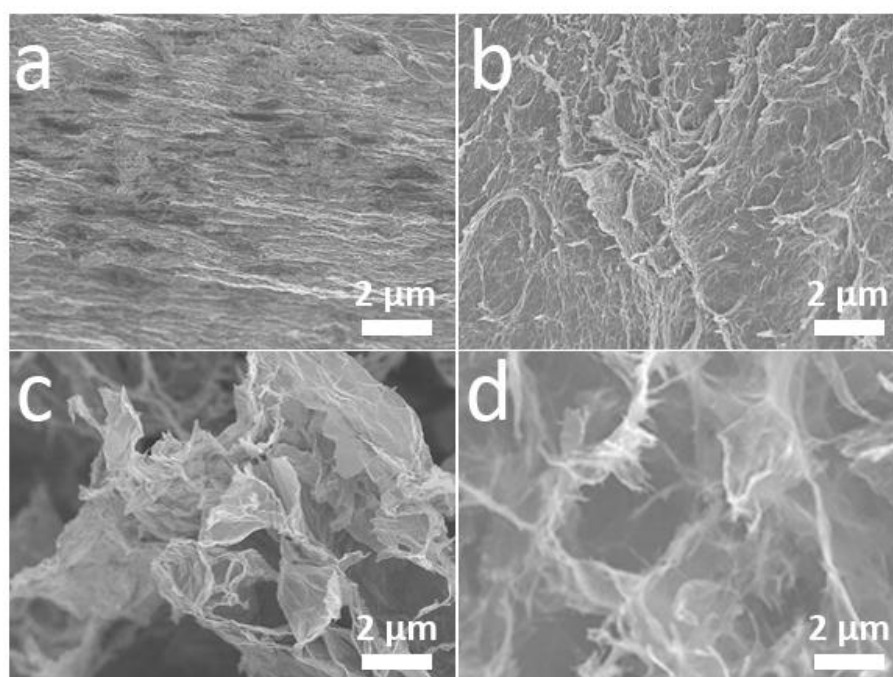

Figure S1. SEM images of the samples of A (a), B (b), C (c), and the pristine 3D graphene (d).

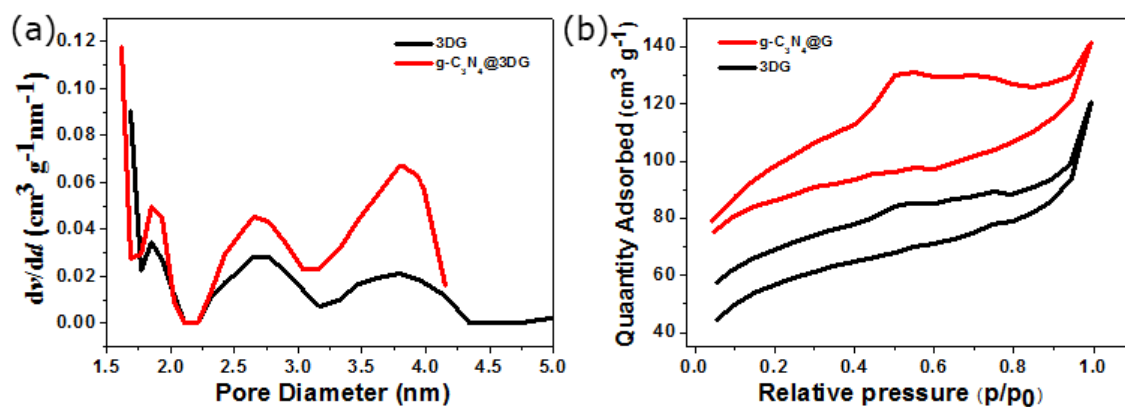

Figure S2. N<sub>2</sub> adsorption-desorption isotherms (a) and pore size distributions (b) of the 3D G and g-C<sub>3</sub>N<sub>4</sub>@G material, respectively.
